# Supplementary material
Source: PubMed Central journal article supplement (PMC5016162)
Supplement: 10.1074_M116.728485_jbc.M116.728485-1.pdf [file 10.1074_M116.728485_jbc.M116.728485-1.pdf]

## Supplementary Data

Design and Characterization of *Erwinia Chrysanthemi* L-Asparaginase Variants with Diminished  
L-Glutaminase Activity

Hien Anh Nguyen<sup>1,2</sup>, Ying Su<sup>1,2</sup> and Arnon Lavie<sup>1,2,\*</sup>

From <sup>1</sup>The Jesse Brown VA Medical Center, Chicago, Illinois and the <sup>2</sup>Department of Biochemistry and  
Molecular Genetics, University of Illinois at Chicago, Chicago, Illinois, 60607, United States

Running title: *Development of a low glutaminase L-asparaginase*

\*To whom correspondence should be addressed: Arnon Lavie, PhD, 900 South Ashland Avenue, MBRB  
room 1108, Chicago, IL, 60607. Phone: (312) 355-5029; Fax: (312) 355-4535; E-mail Lavie@uic.edu

Figure S1

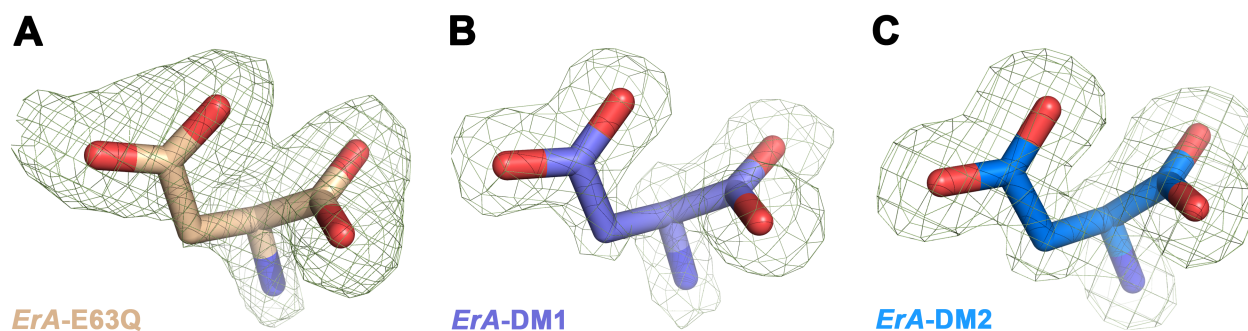

**ASP Simulated annealing omit maps.** Omit density for the ligand ASP as seen in **A**. *ErA-E63Q* (wheat). **B**. *ErA-DM1* (slate). **C**. *ErA-DM2* (marine). Map shown is a simulated annealing omit map, contoured at 3.0 sigma, where the ligand ASP was not included in the model.
